# Supplementary material
Source: publisher figshare collection journal article supplement (https://sage.figshare.com/ndownloader/files/20098427)
Supplement: Supplementary file 1 [file 20098427]

## Appendix

Table A1: Logistic regression of compliance regarding automated and manual data collection on respondent characteristics including interactions

|                                            | Compliance  |                       |
|--------------------------------------------|-------------|-----------------------|
|                                            | Coefficient | Robust standard error |
| question type automated                    | -4.29 ***   | 0.96                  |
| Female                                     | -0.15       | 0.13                  |
| Age                                        | -0.01       | 0.01                  |
| Single household                           | 1.92 **     | 0.97                  |
| East Germany                               | 0.34 *      | 0.18                  |
| Medium education                           | -0.65       | 0.63                  |
| High education                             | -0.35       | 0.68                  |
| Neuroticism                                | 0.02        | 0.80                  |
| Agreeableness                              | 0.28        | 0.25                  |
| Extraversion                               | 0.50 ***    | 0.18                  |
| Conscientiousness                          | -0.02       | 0.08                  |
| Openness                                   | -0.29       | 0.21                  |
| Location: at work                          | -0.93       | 0.66                  |
| Location: outside                          | -1.07 *     | 0.58                  |
| Private computer use: every day            | 0.26        | 0.31                  |
| Private computer use: every week           | -0.08       | 0.31                  |
| Private computer use: every month          | 0.33        | 0.36                  |
| question type automated * age              | 0.03 **     | 0.01                  |
| question type automated * single household | -2.19 **    | 0.97                  |
| question type automated * medium education | 0.34        | 0.62                  |
| question type automated * high education   | -0.07       | 0.67                  |
| question type automated * agreeableness    | -0.08       | 0.25                  |
| question type automated * extraversion     | -0.49 ***   | 0.18                  |
| question type automated * openness         | 0.44 **     | 0.21                  |
| question type automated * at work          | 0.56        | 0.69                  |
| question type automated * outside          | 0.69        | 0.63                  |
| Constant                                   | 2.62 **     | 1.04                  |
| N                                          | 2136        |                       |
| McFadden's pseudo R <sup>2</sup>           | 0.25        |                       |

Notes: Standard errors are clustered by PSU, household, and respondent.

\*\*\*p < .01; \*\*p < .05; \*p < .1
